# Supplementary material for: Antifungal mechanism of (E)-2-hexenal against Botrytis cinerea growth revealed by transcriptome analysis
Source: Front Microbiol. 2022 Aug 22;13:951751. doi: 10.3389/fmicb.2022.951751 (PMC9444101; doi:10.3389/fmicb.2022.951751)
Supplement: Supplementary file 1 [file Data_Sheet_1.xls]

## Sheet:  title page
Journal name	Applied Microbiology and Biotechnology
Manuscript Title	RNAseq-based transcriptiome profiling analysis of (E)-2-hexenal-treated Botrytis cinerea genes targeting ergosterol biosynthesis
The name(s) of the author(s)	Ge Song, Shenglong Du, Helong Sun, Quanwu Liang, Haihua Wang, Mingli Yan, Jihong Zhang
The affiliation(s) and address(es) of the author(s)	1 Hunan Key Laboratory of Economic Crops Genetic Improvement and Integrated Utilization, Hunan University of Science and Technology, Xiangtan 411201, China
	2 Department of Chemical Engineering, Xiangtan University, Xiangtan 411105, China
Corresponding author	Tel: +86 731 58291416; fax: +86 731 58291416. E-mail address: jihongzh01@hnust.edu.cn;

## Sheet: Table.S1 Numbers of DEGs
Table. S1 Numbers of differentially expressed genes in KEGG Pathway between Control (CK) and (E)-2-hexenal-treated of B. cinerea mycelia transcriptomes
#	KEGG Pathway	DEGs genes with pathway annotation (2113)	All genes with pathway annotation (5876)	Pathway ID
1	Ribosome	97 (4.59%)	110 (1.87%)	ko03010
2	Meiosis	40 (1.89%)	64 (1.09%)	ko04113
3	Aminoacyl-tRNA biosynthesis	30 (1.42%)	44 (0.75%)	ko00970
4	Cell cycle	49+35 (3.96%)	84+56 (2.38%)	ko04111
5	DNA replication	24 (1.14%)	36 (0.61%)	ko03030
6	Lysine biosynthesis	9 (0.43%)	11 (0.19%)	ko00300
7	2-Oxocarboxylic acid metabolism	23 (1.09%)	38 (0.65%)	ko01210
8	Mismatch repair	16 (0.76%)	25 (0.43%)	ko03430
9	Biosynthesis of amino acids	62 (2.93%)	129 (2.20%)	ko01230
10	Biotin metabolism	8 (0.38%)	11 (0.19%)	ko00780
11	Nucleotide excision repair	23 (1.09%)	44 (0.75%)	ko03420
12	Spliceosome	44 (2.08%)	92 (1.57%)	ko03040
13	Arginine biosynthesis	13 (0.62%)	22 (0.37%)	ko00220
14	Apoptosis	8 (0.38%)	34 (0.58%)	ko04210
15	Oocyte meiosis	17 (0.80%)	39 (0.66%)	ko04114
16	Regulation of actin cytoskeleton	7 (0.33%)	25 (0.43%)	ko04810
17	Autophagy	50 (2.37%)	125 (2.13%)	ko04138
18	Endocytosis	26 (1.23%)	74 (1.26%)	ko04144
19	Lysosome	7 (0.33%)	37 (0.63%)	ko04142
20	Peroxisome	22 (1.04%)	58 (0.99%)	ko04146
21	Phagosome	15 (0.71%)	38 (0.65%)	ko04145
22	AMPK signaling pathway	12 (0.57%)	30 (0.51%)	ko04152
23	Calcium signaling pathway	2 (0.09%)	14 (0.24%)	ko04020
24	cAMP signaling pathway	3 (0.14%)	21 (0.36%)	ko04024
25	FoxO signaling pathway	8 (0.38%)	23 (0.39%)	ko04068
26	MAPK signaling pathway	29 (1.37%)	116 (1.97%)	ko04010
27	Phosphatidylinositol signaling pathway	6 (0.28%)	20 (0.34%)	ko04070
28	Proteasome	8 (0.38%)	35 (0.60%)	ko03050
29	Protein export	9 (0.43%)	18 (0.31%)	ko03060
30	Protein processing in endoplasmic reticulum	40 (1.89%)	87 (1.48%)	ko04141
31	RNA degradation	22 (1.04%)	52 (0.88%)	ko03018
32	SNARE interactions in vesicular transport	9 (0.43%)	18 (0.31%)	ko04130
33	Ubiquitin mediated proteolysis	22 (1.04%)	60 (1.02%)	ko04120
34	Base excision repair	10 (0.47%)	18 (0.31%)	ko03410
35	Basal transcription factors	13 (0.62%)	32 (0.54%)	ko03022
36	RNA polymerase	11 (0.52%)	31 (0.53%)	ko03020
37	Ribosome biogenesis in eukaryotes	13 (0.62%)	74 (1.26%)	ko03008
38	RNA transport	36 (1.70%)	94 (1.60%)	ko03013
39	Alanine, aspartate and glutamate metabolism	10 (0.47%)	29 (0.49%)	ko00250
40	Arginine and proline metabolism	16 (0.76%)	39 (0.66%)	ko00330
41	Cysteine and methionine metabolism	24 (1.14%)	52 (0.88%)	ko00270
42	Glycine,serine and threonine metabolism	20 (0.95%)	47 (0.80%)	ko00260
43	Phenylalanine metabolism	12 (0.57%)	30 (0.51%)	ko00360
44	Tyrosine metabolism	14 (0.66%)	41 (0.70%)	ko00380
45	Isoquinoline alkaloid biosynthesis	9 (0.43%)	24 (0.41%)	ko00950
46	Amino sugar and nucleotide sugar metabolism	17 (0.80%)	57 (0.97%)	ko00520
47	Citrate cycle (TCA cycle)	4 (0.19%)	26 (0.44%)	ko00020
48	Fructose and mannose metabolism	14 (0.66%)	37 (0.63%)	ko00051
49	Galactose metabolism	12 (0.57%)	30 (0.51%)	ko00052
50	Glycolysis/Gluconeogenesis	17 (0.80%)	41 (0.70%)	ko00010
51	Inositol phosphate metabolism	9 (0.43%)	23 (0.39%)	ko00562
52	Pentose and glucuronate interconversions	12 (0.57%)	33 (0.56%)	ko00040
53	Pentose phosphate pathway	11 (0.52%)	28 (0.48%)	ko00030
54	Propanoate metabolism	9 (0.43%)	26 (0.44%)	ko00640
55	Pyruvate metabolism	11 (0.52%)	33 (0.56%)	ko00620
56	Starch and sucrose metabolism	17 (0.80%)	65 (1.11%)	ko00500
57	Carbon fixation in photosynthetic organisms	11 (0.52%)	25 (0.43%)	ko00710
58	Oxidative phosphorylation	23 (1.09%)	78 (1.33%)	ko00190
59	Sulfur metabolism	10 (0.47%)	19 (0.32%)	ko00920
60	N-Glycan biosynthesis	18 (0.85%)	39 (0.66%)	ko00510
61	Glycerophospholipid metabolism	12 (0.57%)	44 (0.75%)	ko00564
62	Glutathione metabolism	15 (0.71%)	41 (0.70%)	ko00480
63	Purine metabolism	32 (1.51%)	92 (1.57%)	ko00230
64	Pyrimidine metabolism	31 (1.47%)	68 (1.16%)	ko00240
65	Carbon metabolism	44 (2.08%)	124 (2.11%)	ko01200
66	Fatty acid biosynthesis	6 (0.28%)	14 (0.24%)	ko00061
67	Fatty acid degradation	7 (0.33%)	23 (0.39%)	ko00071
68	Fatty acid metabolism	14 (0.66%)	35 (0.60%)	ko01212
69	Terpenoid backbone biosynthesis	6 (0.28%)	21 (0.36%)	ko00900
70	Steroid biosynthesis	9 (0.43%)	26 (0.44%)	ko00100
71	Steroid hormone biosynthesis	2 (0.09%)	7 (0.12%)	ko00140
72	Plant-pathogen interaction	1 (0.05%)	7 (0.12%)	ko04626

## Sheet: Table.S2 cell integrity
Table. S2 Annotation of Botrytis cinerea unigenes involved into cell integrity.
Gene ID	Gene name	Length	Control	(E)-2-hexenal	Log2 Fold	GO_term	KO_gene
5437282	Bcpcm1	1998	81.54	25.42	-1.50758	carbohydrate metabolic process	PGM3
5426509	Bcrbk1	1601	6.11	2.33	-1.1809	phosphotransferase activity	rbsK,RBKS
5425877	Bccbr1	1401	137.84	337.45	1.46401	oxidoreductase activity
5426413	BcCHSIV	5303	18.31	31.1	1.08303	transferring hexosyl groups	CHS1
5442008	BCIN_01g05750	1501	64.87	13.08	-2.13176	galactose metabolic process	galE,GALE
5431982	BcCHSVII	5485	4.87	14.75	1.84348	transferring hexosyl groups	CHS1
5436532	BCIN_07g00160	1495	62.31	181.45	1.72116	hydrolyzing O-glycosyl compounds
5429026	BcCHSIIIb	3075	0	0.16	5.43618	chitin biosynthetic process	CHS1
5430231	Bcgal7	1585	109.34	41.4	-1.23657	hexose-1-phosphate uridylyltransferase activity	galT,GALT
5437134	BCIN_01g09980	1584	20.37	54.1	1.58817	glucosamine-6-phosphate deaminase activity	nagB,GNPDA
5430820	BcCHSII	4371	5.29	2.19	-1.06086	chitin synthase activity	CHS1
5437327	BCIN_11g02490	1901	120.22	49.74	-1.11054	glycogen biosynthetic process	pgm
5426196	Bcmcr1	1503	30.43	223.37	3.0256	cytochrome-b5 reductase activity
5430753	Bcgal10	1625	145.27	259.94	1.01668	UDP-glucose 4-epimerase activity	galE,GALE
5441962	Bcsec53	1005	87.42	32.64	-1.26893	GDP-mannose biosynthetic process	PMM
5432858	Bcfbp1	1684	52.18	153.1	1.72906	fructose 1,6-bisphosphate 1-phosphatase activity	FBP,fbp
5435971	Bcpsa1	2389	221.62	485.96	1.31239	mannose-1-phosphate guanylyltransferase activity	GMPP
5426677	Bcpgi1	2093	207.68	501.8	1.40679	glucose-6-phosphate isomerase activity	GPI,pgi
5426677	Bcpgi1	2093	207.68	501.8	1.40679	glucose-6-phosphate isomerase activity	GPI,pgi
5429939	Bcglk	4169	90.64	33.59	-1.24599	fructose 6-phosphate metabolic process	HK
5428650	BCIN_04g00030	2471	8.62	17.54	1.20204	glucan 1,4-alpha-glucosidase activity
5428387	BCIN_14g00480	2916	9.73	3.46	-1.34219	glucan catabolic process	bglX
5435376	BCIN_13g05110	2253	145.57	532.14	2.05211	alpha-amylase activity	amyA,malS
5433130	BCIN_09g00200	2450	132.23	274.35	1.23265	hydrolase activity	EGLC
5428296	Bctre1	3102	62.07	124.21	1.18482	alpha-trehalase activity	TREH,treA,treF
5438396	BCIN_04g06250	1782	3.56	6.37	1.02023	Carbohydrate digestion and absorption	amyA,malS
5430162	BCIN_08g06830	3217	1.29	2.99	1.37922	hydrolase activity	bglX
5431928	BCIN_10g05710	1999	105.85	17.7	-2.38177	sucrose alpha-glucosidase activity	sacA
5438953	Bcgph1	3928	21.84	8.89	-1.11031	carbohydrate metabolic process	glgP,PYG
5436664	Bctps2	3941	29.75	10.91	-1.27729	trehalose biosynthetic process	TPS
5427880	BCIN_02g06930	6982	23.65	48.61	1.23667	1,3-beta-D-glucan synthase complex
5437327	BCIN_11g02490	1901	120.22	49.74	-1.11054	glucose metabolic process	pgm
5427894	BCIN_15g02440	2682	2.96	6.23	1.24802	beta-glucosidase activity	bglX
5441229	Bccel5A	1822	9.05	73.81	3.19751	carbohydrate metabolic process
5427802	BCIN_13g03010	3008	3.77	1.07	-1.63701	beta-glucosidase activity

## Sheet: Table.S3 cell wall
Table S3. Annotation of Botrytis cinerea unigenes involved into cell wall.
Gene ID	Gene name	Length	Control	(E)-2-hexenal	Log2 Fold	GO_term	KO_gene
5440804	BCIN_06g00800	1267	106.63	21.52	-2.15417	inositol monophosphate 1-phosphatase activity	IMPA,suhB
5432818	Bcvps34	3118	5.15	1.79	-1.35583	Inositol phosphate metabolism	PIK3C3,VPS34
5425640	Bcmss4	4250	28.7	11.27	-1.16868	phosphatidylinositol phosphate kinase activity	PIP5K
5431972	Bclsb6	2708	16.61	6.5	-1.17151	phosphatidylinositol 4-kinase	PI4K2
5439813	BCIN_06g04900	1112	39.9	9.61	-1.90436	inositol metabolic process	IMPA,suhB
5430081	Bcpik1	3867	16.34	7.25	-1.00895	phosphotransferase activity	PI4KB
36394059	Bcbrn2	1160	7.51	41.16	2.61537	oxidoreductase activity	fabG
5428598	BCIN_05g07000	3163	0.88	4.52	2.54184	metabolic process	ACSL,fadD
5437172	BCIN_11g01810	987	13.17	5.27	-1.19381	oxidoreductase activity	fabG
5440324	BCIN_05g05450	1023	42.06	233.51	2.63855	Biotin metabolism	fabG
5437360	BCIN_11g02670	1050	1.13	7.6	2.91174	oxidoreductase activity	fabG
5427255	BCIN_15g04320	2158	9.79	31.78	1.86404	catalytic activity	ACSL,fadD
5428870	BCIN_01g05120	2513	472.63	1182.43	1.49975	oxidoreductase activity	FAD2
5434521	Bcphs1	1100	13.31	5.93	-1.02451	Fatty acid metabolism	PHS1,PAS2
5428851	Bcpot1	1639	9.01	1.23	-2.67511	alpha-Linolenic acid metabolism	ACAA1
5426941	BCIN_03g07760	1658	0.05	0.7	4.13349	Biosynthesis of unsaturated fatty acids	FAD2
5441534	BCIN_03g05840	1089	84.22	31.91	-1.2487	metabolic process	ECHS1
5428213	Bcole1	2028	1589.28	3600.81	1.3542	stearoyl-CoA 9-desaturase activity	SCD,desC
5431110	BCIN_02g06310	1878	0.53	2.81	2.5902	oxidation-reduction process	FAD2
5432821	Bcetr1	2153	42.73	14.04	-1.43429	oxidation-reduction process	MECR,NRBF1
5437891	Bcebp4	1189	10.29	4.13	-1.14924	cholestenol delta-isomerase activity	EBP
5434953	BCIN_04g01080	3254	16.03	52.94	1.90507	O-acyltransferase activity	SOAT
5429675	Bcerg3	2398	548.94	152.47	-2.02405	oxidoreductase activity	SC5DL,ERG3
36395016	BCIN_16g04070	1413	3.21	0.6	-2.46305	oxidoreductase activity	NSDHL,ERG26
5427930	Bcerg1	2624	110.07	249.69	1.36912	squalene monooxygenase activity	SQLE,ERG1
5427932	BCIN_01g00350	1961	1170.28	357.2	-1.88962	fatty acid biosynthetic process	SC4MOL,ERG25
5432464	BCIN_08g02190	1857	3.6	12.34	1.97049	steroid biosynthetic process	NSDHL,ERG26
5436466	BCIN_02g00670	2445	8.19	1.39	-2.44224	isomerase activity	LSS,ERG7
5441422	Bcerg27	1977	24.9	8.23	-1.43077	3-ketosteroid reductase	ERG27

## Sheet: Table.S4 terpenoid backbone
Table S4. Annotation of Botrytis cinerea unigenes involved into terpenoid backbone biosynthesis.
Gene ID	Gene name	Length	Control	(E)-2-hexenal	Log2 Fold	GO_term	KO_gene
5427167	Bcmvd1	1543	38.74	12.47	-1.4806	isoprenoid biosynthetic process	MVD,mvaD
5433401	BCIN_14g01170	1639	16.38	83.16	2.53338	isoprenoid biosynthetic process	GGPS1
5438886	Bcerg20	1495	49.905	17.53	-1.3477	farnesyl diphosphate biosynthetic process	FDPS
5440462	Bcrer2	1223	45.395	18.645	-1.13115	dehydrodolichyl diphosphate synthase activity	DHDDS,RER2,SRT1
5440445	Bcerg12	2172	31.455	8.26	-2.01657	isoprenoid biosynthetic process	MVK,mvaK1
5430776	Bcidi1	1218	65.245	23.19	-1.33873	isoprenoid biosynthetic process	idi,IDI
5427930	Bcerg1	2624	110.07	249.69	1.36912	flavin adenine dinucleotide binding	SQLE,ERG1
5437891	Bcebp4	1189	10.29	4.13	-1.14924	cholestenol delta-isomerase activity	EBP
5434953	BCIN_04g01080	3254	16.025	52.935	1.90507	O-acyltransferase activity	SOAT
5429675	Bcerg3	2398	152.47	548.94	2.02405	fatty acid biosynthetic process	SC5DL,ERG3
36395016	BCIN_16g04070	1413	3.21	0.595	-2.46305	steroid biosynthetic process	NSDHL,ERG26
5427932	BCIN_01g00350	1961	357.2	1170.28	1.88962	fatty acid biosynthetic process	SC4MOL,ERG25
5432464	BCIN_08g02190	1857	3.6	12.335	1.97049	steroid biosynthetic process	NSDHL,ERG26
5436466	BCIN_02g00670	2445	8.19	1.385	-2.44224	isomerase activity	LSS,ERG7
5441422	Bcerg27	1977	24.9	8.225	-1.43077	integral component of membrane	ERG27
5428544	Bcdfg10	1058	2.93	10.17	1.93855	3-oxo-5-alpha-steroid 4-dehydrogenase	SRD5A3
5438637	BCIN_12g01950	1520	3.375	6.145	1.03728	methyltransferase activity	COMT
5427930	Bcerg1	2624	110.07	249.685	1.36912	squalene monooxygenase activity	SQLE,ERG1

## Sheet: Table. S5 energy  metabolism
Table S5. Annotation of other Botrytis cinerea unigenes involved into energy metabolism.
Gene ID	Gene name	Length	Control	(E)-2-hexenal	Log2 Fold	GO_term	KO_gene
5426677	Bcpgi1	2093	207.68	501.8	1.40679	glucose-6-phosphate isomerase activity	GPI,pgi
5441913	Bcenol1	1572	595.03	132.4	-2.005	phosphopyruvate hydratase activity	ENO,eno
5429939	Bcglk	4169	90.64	33.59	-1.24599	fructose 6-phosphate metabolic process	HK
5428786	BCIN_11g06230	1796	136.55	291.11	1.37254	phosphoglycerate kinase activity	MPV17;PGK,pgk
5432858	Bcfbp1	1684	52.18	153.1	1.72906	fructose 1,6-bisphosphate 1-phosphatase activity	FBP,fbp
5431115	BCIN_02g06270	1857	191.94	66.76	-1.36236	phosphoglycerate mutase	gpmI
5438305	BCIN_04g05860	857	123.1	16.54	-2.77752	sedoheptulose-bisphosphatase activity	gpmB
36394754	BCIN_12g05970	547	0.48	9.14	4.49154	phosphopyruvate hydratase activity	ENO,eno
5428785	Bcpgk1	1652	199.91	57.79	-1.63363	phosphoglycerate kinase	PGK,pgk
5437115	Bcpic7	2153	133.94	60.06	-1.00188	pyruvate kinase activity	PK,pyk
5430430	BCIN_01g02900	1426	9.74	25.9	1.56943	oxidation-reduction process	adhP
5435315	BCIN_13g05580	2115	126.07	2319.66	4.37855	alcohol dehydrogenase	adhP
5427690	Bclat1	1788	432.79	187.43	-1.04481	mitochondrial pyruvate dehydrogenase complex	DLAT,aceF,pdhC
5437327	BCIN_11g02490	1901	120.22	49.74	-1.11054	glycogen biosynthetic process	pgm
5427363	Bcpck1	2522	239.7	566.6	1.41925	phosphoenolpyruvate carboxykinase activity	pckA
5430647	BCIN_08g06300	3566	126.19	22.22	-2.32727	fructose 6-phosphate metabolic process	pfkA,PFK
5431070	BCIN_02g06580	2316	322.7	2167.96	2.92245	carboxy-lyase activity	pdc
5437138	BCIN_01g09950	4391	96.62	41.08	-1.06589	pyruvate metabolic process	PC,pyc
5428554	Bcdld1	2158	30.72	4.5	-2.60443	Pyruvate metabolism	dld,LDHD
5441478	BCIN_03g05490	1434	41.41	16.94	-1.12267	hydroxyacylglutathione hydrolase activity	gloB
5437115	Bcpic7	2153	133.94	60.06	-1.00188	pyruvate kinase activity	PK,pyk
5433821	BCIN_09g06410	2646	123.7	40.24	-1.44364	carboxylic acid metabolic process	leuA
5429429	BCIN_07g03830	3007	12.05	38.8	1.88206	malate metabolic process	maeB
5427690	Bclat1	1788	432.79	187.43	-1.04481	mitochondrial pyruvate dehydrogenase complex	DLAT,aceF,pdhC
5427363	Bcpck1	2522	239.7	566.6	1.41925	phosphoenolpyruvate carboxykinase activity	pckA
5430725	BCIN_14g05400	2226	425.74	793.92	1.07924	homocitrate synthase activity	LYS21,LYS20
5436851	BCIN_13g03210	1304	75.7	32.47	-1.04685	lactoylglutathione lyase activity	GLO1,gloA
5436353	BCIN_10g00890	2035	1.06	3.43	1.84413	flavin adenine dinucleotide binding	dld,LDHD
5430239	BCIN_15g05420	2154	66.9	21.12	-1.37866	acetyl-CoA:L-glutamate N-acetyltransferase activity
5430240	Bcarg2	3198	24.48	5.78	-1.90537	acetyl-CoA:L-glutamate N-acetyltransferase activity
5428851	Bcpot1	1639	9.01	1.23	-2.67511	transferring acyl groups	ACAA1
5427690	Bclat1	1788	432.79	187.43	-1.04481	acetyl-CoA biosynthetic process from pyruvate	DLAT,aceF,pdhC
5432913	BCIN_08g05100	2358	39.69	17.47	-1.0142	catalytic activity
5437138	BCIN_01g09950	4391	96.62	41.08	-1.06589	pyruvate metabolic process	PC,pyc
5442019	Bcbpl1	2526	10.45	4.47	-1.06428	acetyl-CoA-carboxylase	HLCS
5435145	Bcarg5	3499	84.21	23.05	-1.69812	acetyl-CoA:L-glutamate N-acetyltransferase activity	ARG56
5437138	BCIN_01g09950	4391	96.62	41.08	-1.06589	pyruvate metabolic process	PC,pyc
5427363	Bcpck1	2522	239.7	566.6	1.41925	phosphoenolpyruvate carboxykinase activity	pckA
5427127	BCIN_09g00980	2224	160.81	22.37	-2.68585	isocitrate dehydrogenase (NADP+) activity	IDH1,IDH2,icd
5427690	Bclat1	1788	432.79	187.43	-1.04481	mitochondrial pyruvate dehydrogenase complex	DLAT,aceF,pdhC
5431339	BCIN_16g04810	695	4137.14	912.3	-2.01779	malate dehydrogenase activity	RP-L28e,RPL28
5429298	BCIN_15g00140	1822	29.89	105.05	1.98948	succinate dehydrogenase activity	DDC
5440968	BCIN_06g01640	2140	40.89	17.08	-1.08527	aldehyde dehydrogenase (NAD) activity	gabD
5427291	Bcleu2	1493	783.82	152.11	-2.26466	3-isopropylmalate dehydrogenase activity	leuB
5427127	BCIN_09g00980	2224	160.81	22.37	-2.68585	isocitrate dehydrogenase (NADP+) activity	IDH1,IDH2,icd
5427690	Bclat1	1788	432.79	187.43	-1.04481	mitochondrial pyruvate dehydrogenase complex	DLAT,aceF,pdhC
5430215	CND9	2184	260.98	92.18	-1.34624	mannitol-1-phosphate 5-dehydrogenase activity	mtlD
5429023	BCIN_01g02500	1575	48.48	21.06	-1.03764	sorbitol dehydrogenase protein	SORD,gutB
5429679	Bcfdh1	1468	110.26	299.05	1.59989	formate dehydrogenase (NAD+) activity	FDH
5430422	BCIN_01g03020	2158	46.74	11.88	-1.79621	aldehyde dehydrogenase (NAD) activity	mmsA,iolA,ALDH6A1
5440968	BCIN_06g01640	2140	40.89	17.08	-1.08527	succinate semialdehyde dehydrogenase	gabD
5428782	BCIN_11g06270	2135	118.94	13.27	-2.9946	aldehyde dehydrogenase (NAD) activity	gabD
5429298	BCIN_15g00140	1822	29.89	105.05	1.98948	succinate dehydrogenase activity	DDC

## Sheet: Table. S6 energy  metabolism
Table. S6 Annotation of Botrytis cinerea unigenes other pathways involved into energy metabolism about pyruvate, acetyl-CoA and dehydrogenases metabolic process.
Gene ID	Gene name	Length	Control	(E)-2-hexenal	Log2 Fold	GO_term	KO_gene
5437138	BCIN_01g09950	4391	96.62	41.08	-1.06589	pyruvate metabolic process	PC,pyc
5427363	Bcpck1	2522	239.7	566.6	1.41925	phosphoenolpyruvate carboxykinase activity	pckA
5427127	BCIN_09g00980	2224	160.81	22.37	-2.68585	isocitrate dehydrogenase (NADP+) activity	IDH1,IDH2,icd
5427690	Bclat1	1788	432.79	187.43	-1.04481	mitochondrial pyruvate dehydrogenase complex	DLAT,aceF,pdhC
5434275	Bcatp4	914	815.46	338.13	-1.10409	proton-transporting ATPase activity	ATPeF0B
5429714	BCIN_06g06130	855	167.69	67.13	-1.16239	NADH dehydrogenase activity	NDUFB8
5433184	BCIN_09g00540	1128	367.01	135.73	-1.28664	NADH dehydrogenase (ubiquinone) activity	NDUFV2
5428113	Bccox17	515	684.51	2423.68	1.9562	intracellular copper ion transport	COX17
5431719	BCIN_12g06020	2518	662.11	2182.68	1.54545	ATPase activity	PMA1
36394020	BCIN_03g02770	1040	18.93	67.87	2.00534	cellular iron ion homeostasis	ATP6L
5426795	Bcacp1	884	580.4	200.53	-1.37931	fatty acid biosynthetic process	NDUFAB1
5436317	BCIN_10g01120	654	244.44	83.34	-1.40127	nadh:ubiquinone oxidoreductase	NDUFS5
5432967	Bcvma5	1409	33.54	7.53	-2.01698	proton-transporting V-type ATPase	ATP6C
5434034	BCIN_08g01490	728	353.63	97.66	-1.71539	NADH dehydrogenase (ubiquinone) activity	NDUFA8
5425822	BCIN_02g05970	872	127.56	22.89	-2.32983	protein-lysine N-methyltransferase activity	NDUFA9
5434979	BCIN_04g00750	3973	3.07	13.77	2.3003	hydrogen-exporting ATPase activity	PMA1,PMA2
5439030	Bcvma13	1939	36.08	6.54	-2.32071	proton-transporting ATPase activity	ATPeV1H
5434621	Bcatp3	1561	565.24	236.75	-1.08871	ATP biosynthetic process	ATPeF1G,ATP5C1,ATP3
5434436	Bcvma8	868	80.2	23.03	-1.66318	ATPase activity	ATPeV1D,ATP6M
5426945	BCIN_03g07820	961	240.625	63.875	-1.76049	oxidoreductase activity	NDUFA5
5431245	BCIN_16g03780	731	520.49	147.965	-1.67556	mitochondrial electron transport	NDUFS6
5432062	BCIN_09g03920	769	156.11	35.835	-1.97957	NADH-ubiquinone oxidoreductase	NDUFA2
5436159	Bcndi1	2170	18.93	7.64	-1.12092	oxidoreductase activity	ndh
36393910	BCIN_02g01370	2543	109.24	42.61	-1.19115	NADH dehydrogenase (ubiquinone) activity	NDUFS1
5425824	BCIN_02g05960	1450	229.42	54.11	-1.92276	nadh-ubiquinone oxidoreductase	NDUFA9
5433334	Bcvma10	1613	127.64	39.73	-1.16855	nucleotidyltransferase activity	ATPeV1G,ATP6G
5438729	BCIN_12g02610	1280	287.71	113.41	-1.18237	ATP synthesis	ATPeFK,ATP19
5426677	Bcpgi1	2093	207.68	501.8	1.40679	glucose-6-phosphate isomerase activity	GPI,pgi
5441913	Bcenol1	1572	595.03	132.4	-2.005	phosphopyruvate hydratase activity	ENO,eno
5429939	Bcglk	4169	90.64	33.59	-1.24599	fructose 6-phosphate metabolic process	HK
5428786	BCIN_11g06230	1796	136.55	291.11	1.37254	phosphoglycerate kinase activity	MPV17;PGK,pgk
5432858	Bcfbp1	1684	52.18	153.1	1.72906	fructose 1,6-bisphosphate 1-phosphatase activity	FBP,fbp
5431115	BCIN_02g06270	1857	191.94	66.76	-1.36236	phosphoglycerate mutase	gpmI
5438305	BCIN_04g05860	857	123.1	16.54	-2.77752	sedoheptulose-bisphosphatase activity	gpmB
36394754	BCIN_12g05970	547	0.48	9.14	4.49154	phosphopyruvate hydratase activity	ENO,eno
5428785	Bcpgk1	1652	199.91	57.79	-1.63363	phosphoglycerate kinase	PGK,pgk
5437115	Bcpic7	2153	133.94	60.06	-1.00188	pyruvate kinase activity	PK,pyk
5430430	BCIN_01g02900	1426	9.74	25.9	1.56943	oxidation-reduction process	adhP
5435315	BCIN_13g05580	2115	126.07	2319.66	4.37855	alcohol dehydrogenase	adhP
5437327	BCIN_11g02490	1901	120.22	49.74	-1.11054	glycogen biosynthetic process	pgm
5430647	BCIN_08g06300	3566	126.19	22.22	-2.32727	fructose 6-phosphate metabolic process	pfkA,PFK
5431070	BCIN_02g06580	2316	322.7	2167.96	2.92245	carboxy-lyase activity	pdc
5442000	BcniiA	3949	24.495	43.105	1.00035	nitrite reductase	NIT-6
5441932	BccrnA	1807	10.2	108.45	3.60278	nitrate transporter	NRT,narK,nrtP,nasA
5433191	BCIN_09g00590	1879	62.52	14.91	-1.91277	glutamate-ammonia ligase activity	glnA,GLUL
5438395	BCIN_04g06240	1384	166.08	420.15	1.51662	nitronate monooxygenase activity	ncd2,npd
5425906	BCIN_02g06860	1963	7.61	15.85	1.14657	hydrolase activity
5432011	BcniaD	2936	19.05	71.19	2.10015	nitrate assimilation	NR
5436015	BCIN_03g06520	1777	301.79	107.36	-1.31736	carbonate dehydratase activity	cynT,can
5429104	BCIN_05g04610	2032	23.8	6.19	-1.79045	Cysteine and methionine metabolism	cysK
5431090	BcStr2	2175	38.11	11.74	-1.54446	cystathionine gamma-synthase	metB
5434981	Bcmet17	1863	8.68	2.76	-1.53247	cellular amino acid metabolic process	MET17
5437627	Bcmet22	1420	80.92	28.53	-1.34121	bisphosphate nucleotidase	cysQ,MET22,BPNT1
5436105	Bctum1	1503	28.04	12.3	-1.03304	thiosulfate sulfurtransferase	TST,MPST,sseA
5434679	Bcsox1	1973	9.32	132.75	4.00314	nitrate assimilation	SUOX
5429468	Bcmet16	1684	15.6	78.565	2.50799	phosphoadenosine phosphosulfate reductase	cysH
5436910	Bcmet10	4000	36.565	15.495	-1.07187	oxidoreductase activity	cysJ
5438844	BCIN_15g02880	1269	156.24	30.91	-2.19779	pyridoxal phosphate binding	cysK
5431743	BCIN_12g05950	1589	2.29	8.72	2.07678	oxidoreductase activity	sqr
